# Supplementary material for: Minimal Variations of Oral Virome and Microbiome in Human IgA Deficiency
Source: Research Square preprint supplement (doi:10.21203/rs.3.rs-136578/v1), 2020-12-31
Supplement: Supplementary file 1 [file 91476f1e4b6da98ae1715dce.pdf]

**Supplementary Material for**

**Minimal variations of human oral virome and  
microbiome in human IgA deficiency**

Maria José de la Cruz Peña<sup>1</sup>, Luis Ignacio Gonzalez-Granado<sup>2,3</sup>, Inmaculada  
Garcia-Heredia<sup>1</sup>, Lucia Maestre Carballa<sup>1</sup> and Manuel Martinez-Garcia<sup>1\*</sup>

<sup>1</sup>Department of Physiology, Genetics, and Microbiology, University of Alicante, Alicante,  
Spain

<sup>2</sup>Primary Immunodeficiencies Unit. Pediatrics. Hospital 12 Octubre. Instituto de  
Investigación Hospital 12 octubre (imas12). Madrid, Spain

<sup>3</sup> School of Medicine. Complutense University. Madrid. Spain.

\*Correspondence to: [m.martinez@ua.es](mailto:m.martinez@ua.es).

## Public access to metagenomic data and 16S rRNA gene sequences

Viral and microbial assembled metagenomes generated in this study are publicly available at IMG-JGI (23) database under the following identification numbers indicated in the table as **IMG genome ID** that can be used for searching in that database. **Red colour** indicate that these correspond to **CVID samples**

| <b>IMG Genome ID</b> | <b>Genome Name / Sample Name (MICROBIAL METAGENOMES)</b>                                                                        | <b>Genome Size assembled</b> | <b>Gene Count assembled</b> |
|----------------------|---------------------------------------------------------------------------------------------------------------------------------|------------------------------|-----------------------------|
| 3300022491           | Human saliva microbial communities from oral cavities of healthy adults from Alicante, Spain - individual 1                     | 29111330                     | 35157                       |
| 3300022479           | Human saliva microbial communities from oral cavities of healthy adults from Alicante, Spain - individual 10                    | 14084879                     | 17378                       |
| 3300022480           | Human saliva microbial communities from oral cavities of healthy adults from Alicante, Spain - individual 11                    | 5085306                      | 7156                        |
| 3300022482           | Human saliva microbial communities from oral cavities of healthy adults from Alicante, Spain - individual 12                    | 14438064                     | 19279                       |
| 3300022477           | Human saliva microbial communities from oral cavities of healthy adults from Alicante, Spain - individual 14                    | 330036                       | 474                         |
| 3300022488           | Human saliva microbial communities from oral cavities of healthy adults from Alicante, Spain - individual 15                    | 20290665                     | 25879                       |
| 3300022489           | Human saliva microbial communities from oral cavities of healthy adults from Alicante, Spain - individual 16                    | 30886265                     | 38153                       |
| 3300022493           | Human saliva microbial communities from oral cavities of healthy adults from Alicante, Spain - individual 17                    | 52354973                     | 61599                       |
| 3300022473           | Human saliva microbial communities from oral cavities of healthy adults from Alicante, Spain - individual 2                     | 14268001                     | 17389                       |
| 3300022484           | Human saliva microbial communities from oral cavities of healthy adults from Alicante, Spain - individual 3                     | 19175940                     | 23458                       |
| 3300022485           | Human saliva microbial communities from oral cavities of healthy adults from Alicante, Spain - individual 4                     | 17441767                     | 22924                       |
| 3300022474           | Human saliva microbial communities from oral cavities of healthy adults from Alicante, Spain - individual 6                     | 3712523                      | 5230                        |
| 3300022486           | Human saliva microbial communities from oral cavities of healthy adults from Alicante, Spain - individual 7                     | 23689678                     | 28123                       |
| 3300022472           | Human saliva microbial communities from oral cavities of healthy adults from Alicante, Spain - individual 8                     | 9671306                      | 11789                       |
| <b>3300022476</b>    | <b>Human saliva microbial communities from oral cavities of IgA immunodeficiency people from Alicante, Spain - individual 1</b> | 4304770                      | 5960                        |
| 3300022478           | Human saliva microbial communities from oral cavities of IgA immunodeficiency people from Alicante, Spain - individual 10       | 6134852                      | 8428                        |
| <b>3300022475</b>    | <b>Human saliva microbial communities from oral cavities of IgA immunodeficiency people from Alicante, Spain - individual 2</b> | 5166800                      | 6716                        |
| <b>3300022490</b>    | <b>Human saliva microbial communities from oral cavities of IgA immunodeficiency people from Alicante, Spain - individual 3</b> | 33915936                     | 38921                       |
| 3300022483           | Human saliva microbial communities from oral cavities of IgA immunodeficiency people from Alicante, Spain - individual 4        | 19339156                     | 24447                       |
| 3300022487           | Human saliva microbial communities from oral cavities of IgA immunodeficiency people from Alicante, Spain - individual 5        | 25053798                     | 29360                       |
| 3300022590           | Human saliva microbial communities from oral cavities of IgA immunodeficiency people from Alicante, Spain - individual 6        | 71923080                     | 85731                       |
| 3300022495           | Human saliva microbial communities from oral cavities of IgA immunodeficiency people from Alicante, Spain - individual 7        | 58991602                     | 74509                       |
| 3300022496           | Human saliva microbial communities from oral cavities of IgA immunodeficiency people from Alicante, Spain - individual 8        | 15318436                     | 20256                       |
| 3300022494           | Human saliva microbial communities from oral cavities of IgA immunodeficiency people from Alicante, Spain - individual 9        | 57308440                     | 68268                       |

| IMG Genome ID | Genome Name / Sample Name ( <u>VIRAL METAGENOMES</u> )                                                               | Genome Size assembled | Gene Count assembled |
|---------------|----------------------------------------------------------------------------------------------------------------------|-----------------------|----------------------|
| 3300028515    | Human saliva viral communities from oral cavities of healthy adults from Alicante,Spain - individual 1               | 1702328               | 2505                 |
| 3300028504    | Human saliva viral communities from oral cavities of healthy adults from Alicante,Spain - individual 12              | 267982                | 401                  |
| 3300028513    | Human saliva viral communities from oral cavities of healthy adults from Alicante,Spain - individual 13              | 1323485               | 1985                 |
| 3300028516    | Human saliva viral communities from oral cavities of healthy adults from Alicante,Spain - individual 14              | 1819158               | 2617                 |
| 3300028509    | Human saliva viral communities from oral cavities of healthy adults from Alicante,Spain - individual 15              | 1232109               | 1874                 |
| 3300028541    | Human saliva viral communities from oral cavities of healthy adults from Alicante,Spain - individual 17              | 1699083               | 2464                 |
| 3300028537    | Human saliva viral communities from oral cavities of healthy adults from Alicante,Spain - individual 18              | 1098202               | 1714                 |
| 3300028503    | Human saliva viral communities from oral cavities of healthy adults from Alicante,Spain - individual 3               | 698838                | 1014                 |
| 3300028511    | Human saliva viral communities from oral cavities of healthy adults from Alicante,Spain - individual 4               | 1359060               | 1870                 |
| 3300028519    | Human saliva viral communities from oral cavities of healthy adults from Alicante,Spain - individual 5               | 2863798               | 4137                 |
| 3300028514    | Human saliva viral communities from oral cavities of healthy adults from Alicante,Spain - individual 6               | 1492463               | 2160                 |
| 3300028542    | Human saliva viral communities from oral cavities of healthy adults from Alicante,Spain - individual 7               | 4173712               | 5869                 |
| 3300028538    | Human saliva viral communities from oral cavities of healthy adults from Alicante,Spain - individual 8               | 2141600               | 2989                 |
| 3300028520    | Human saliva viral communities from oral cavities of healthy adults from Alicante,Spain - individual 9               | 2287909               | 3239                 |
| 3300028507    | Human saliva viral communities from oral cavities of IgA immunodeficiency people from Alicante,Spain - individual 1  | 889371                | 1414                 |
| 3300028505    | Human saliva viral communities from oral cavities of IgA immunodeficiency people from Alicante,Spain - individual 10 | 276922                | 461                  |
| 3300028508    | Human saliva viral communities from oral cavities of IgA immunodeficiency people from Alicante,Spain - individual 2  | 1024537               | 1419                 |
| 3300028539    | Human saliva viral communities from oral cavities of IgA immunodeficiency people from Alicante,Spain - individual 3  | 953530                | 1412                 |
| 3300028517    | Human saliva viral communities from oral cavities of IgA immunodeficiency people from Alicante,Spain - individual 4  | 1684016               | 2537                 |
| 3300028506    | Human saliva viral communities from oral cavities of IgA immunodeficiency people from Alicante,Spain - individual 5  | 1152454               | 1627                 |
| 3300028512    | Human saliva viral communities from oral cavities of IgA immunodeficiency people from Alicante,Spain - individual 6  | 1492463               | 2160                 |
| 3300028510    | Human saliva viral communities from oral cavities of IgA immunodeficiency people from Alicante,Spain - individual 7  | 1236571               | 1855                 |
| 3300028518    | Human saliva viral communities from oral cavities of IgA immunodeficiency people from Alicante,Spain - individual 8  | 2141600               | 2989                 |
| 3300028544    | Human saliva viral communities from oral cavities of IgA immunodeficiency people from Alicante,Spain - individual 9  | 1207203               | 1877                 |

**16S rRNA gene sequences are available at NCBI with the following Bioproject ID number PRJNA682933**  
**Raw metagenomic reads are available from our bioinformatic server upon request (please email to the corresponding author m.martinez@ua.es)**

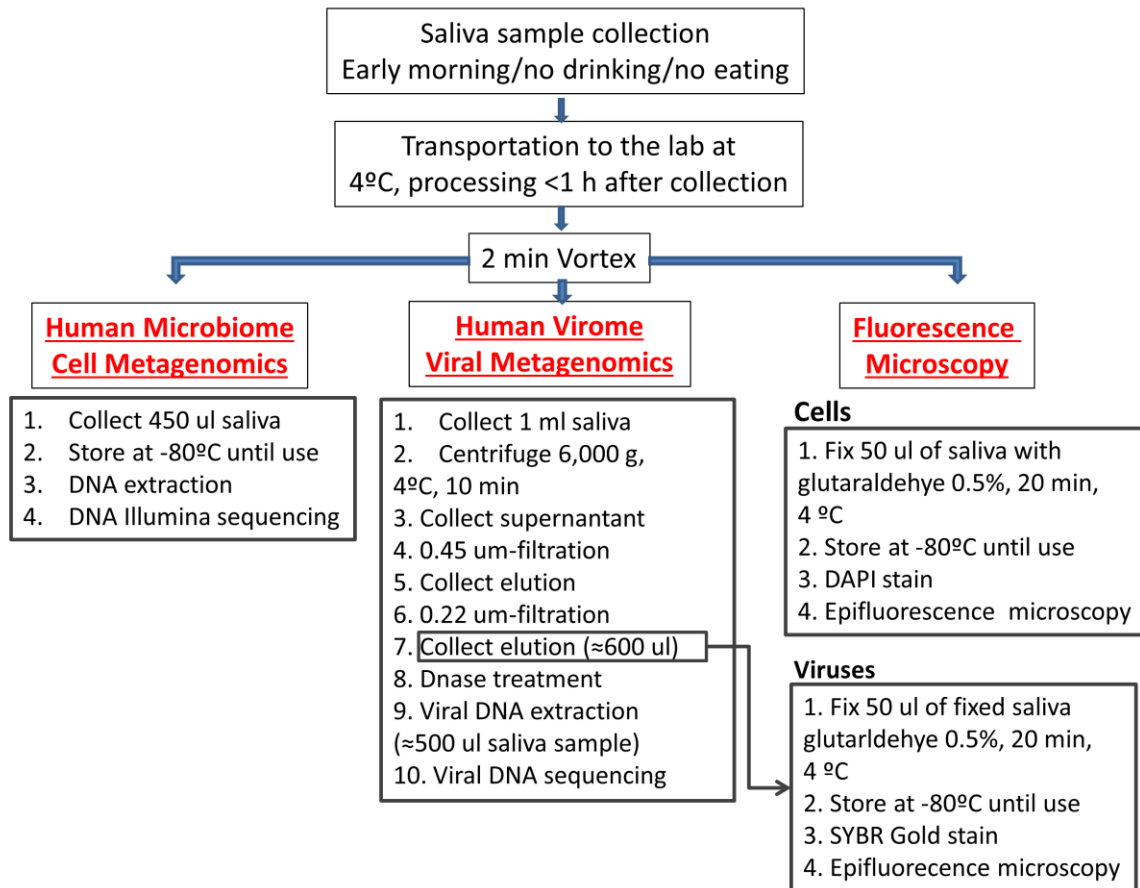

**Fig. S1.** Schematic diagram of saliva sampling and processing

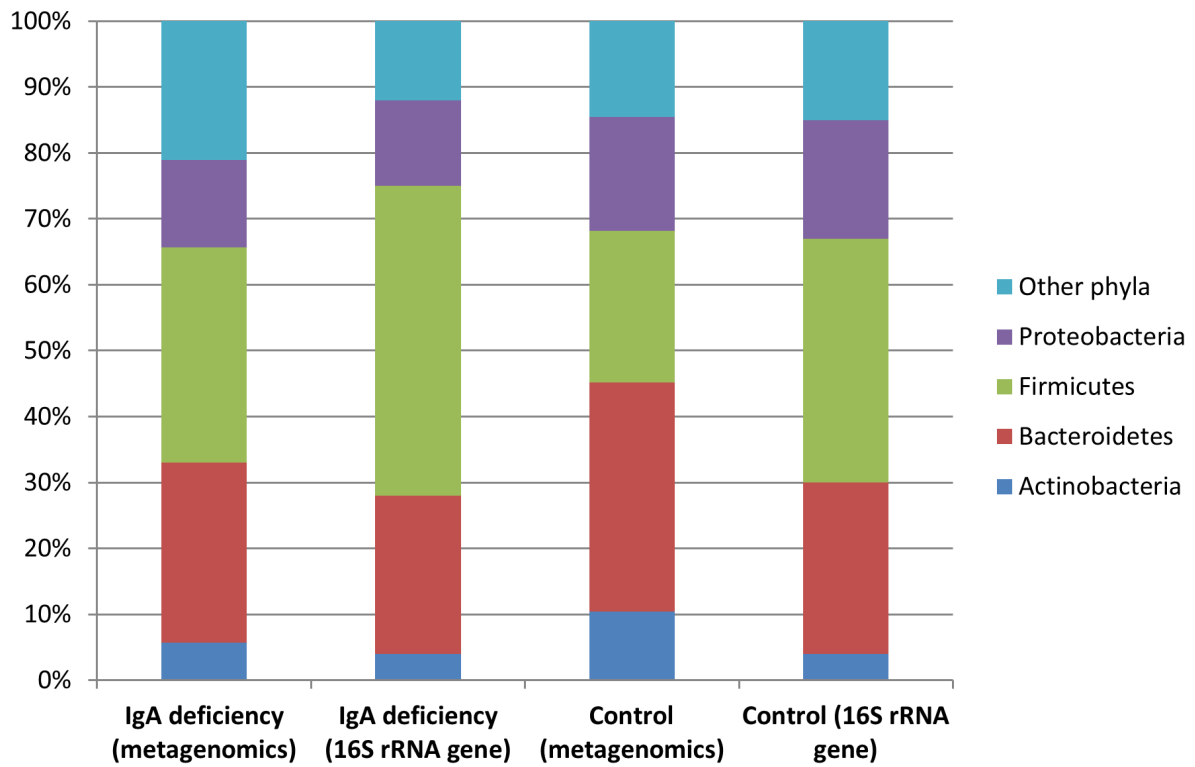

**Fig. S2.** Taxonomic assignment of oral microbiome obtained by metagenomics and 16S rRNA gene analysis. See methods for details.

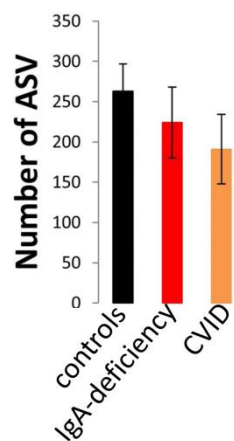

**Fig. S3.** Number of ASV found by Qiime 2 (see method for details) in the analyzed samples. Estimation of difference in alpha richness was then calculated (Fig. 1B).

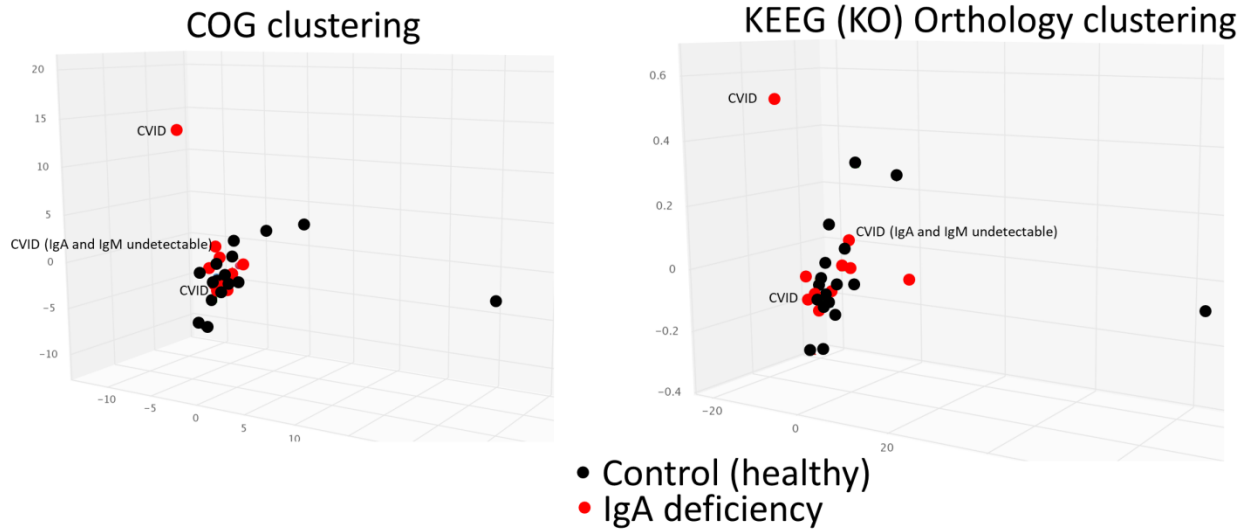

**Fig. S4.** Metagenomic analysis of clustering of samples based on genetic content. ORFs were predicted with Prodigal program at the JGI-IMG platform. Annotation was performed with COG, pfam and KO. All three PCA analyses showed very similar clustering and relatedness between samples. For convenience, pfam clustering is omitted. Note that although two of the analyzed CVID samples were more scattered in the plot, these differences were also observed for some healthy control samples which suggest that natural intrinsic interpersonal variability of our microbiome might lead these differences.

**Table S1: 16S rRNA gene sequences obtained from samples**

| <b>Sample</b>       | <b>N of reads obtained from Miseq</b> | <b>N of reads afer QC</b> | <b>N of joined sequences</b> | <b>N q-score filtered sequences</b> | <b>N sequences after Deblur Denoising</b> |
|---------------------|---------------------------------------|---------------------------|------------------------------|-------------------------------------|-------------------------------------------|
| <b>Control 1</b>    | 633464                                | 623244                    | 294723                       | 142775                              | 3018                                      |
| <b>Control 2</b>    | 396814                                | 389914                    | 184856                       | 86364                               | 2077                                      |
| <b>Control 3</b>    | 348850                                | 342288                    | 161210                       | 68299                               | 1793                                      |
| <b>Control 4</b>    | 477894                                | 469754                    | 222635                       | 102616                              | 2447                                      |
| <b>Control 6</b>    | 345280                                | 339410                    | 160122                       | 74284                               | 2313                                      |
| <b>Control 7</b>    | 452960                                | 444614                    | 210558                       | 94091                               | 2295                                      |
| <b>Control 8</b>    | 433138                                | 425914                    | 201444                       | 93809                               | 2715                                      |
| <b>Control 10</b>   | 430134                                | 422678                    | 200224                       | 94355                               | 2079                                      |
| <b>Control 11</b>   | 510352                                | 500930                    | 236312                       | 103215                              | 2688                                      |
| <b>Control 12</b>   | 445358                                | 437640                    | 207009                       | 96575                               | 2572                                      |
| <b>Control 13</b>   | 510566                                | 502252                    | 237211                       | 112758                              | 252                                       |
| <b>Control 14</b>   | 579006                                | 569102                    | 269708                       | 129915                              | 3329                                      |
| <b>Control 15</b>   | 464716                                | 457618                    | 215998                       | 92419                               | 2281                                      |
| <b>Control 16</b>   | 383942                                | 378324                    | 179562                       | 76090                               | 1803                                      |
| <b>Control 17</b>   | 483166                                | 475802                    | 225737                       | 96942                               | 2534                                      |
| <b>Control 18</b>   | 477880                                | 470934                    | 223912                       | 96902                               | 2738                                      |
| <b>IgA1P (CVID)</b> | 441208                                | 434586                    | 206552                       | 89069                               | 2382                                      |
| <b>IgA2P (CVID)</b> | 492388                                | 484068                    | 229767                       | 93570                               | 2356                                      |
| <b>IgA3P (CVID)</b> | 466550                                | 459434                    | 218362                       | 95370                               | 2817                                      |
| <b>IgA4P</b>        | 437314                                | 430406                    | 204260                       | 84459                               | 2247                                      |
| <b>IgA 5P</b>       | 526896                                | 517578                    | 244959                       | 101682                              | 2324                                      |
| <b>IgA 6P</b>       | 490422                                | 482408                    | 228592                       | 97855                               | 2286                                      |
| <b>IgA 7P</b>       | 496122                                | 488670                    | 231418                       | 101961                              | 2427                                      |
| <b>IgA 8P</b>       | 479434                                | 472294                    | 224260                       | 97478                               | 2410                                      |
| <b>IgA 9P</b>       | 739212                                | 732312                    | 350874                       | 84839                               | 2124                                      |
| <b>IgA 10P</b>      | 495638                                | 488922                    | 233426                       | 104812                              | 2690                                      |

**Table S2.** Unique ASV found only in each one of the group. Note that relative abundance for those ASV is extremely low representing thus rare ASV. Taxonomic assignment was done with SILVA database implemented in Qiime2.

| ASV FOUND ONLY IN IgA patients                                                                                                                      | Mean relative abundance |
|-----------------------------------------------------------------------------------------------------------------------------------------------------|-------------------------|
| d__Bacteria; p__Bacteroidota; c__Bacteroidia; o__Bacteroidales; f__Porphyromonadaceae; g__Porphyromonas                                             | 0,04797593              |
| d__Bacteria; p__Fusobacteriota; c__Fusobacteriia; o__Fusobacteriales; f__Leptotrichiaceae; g__Leptotrichia; s__Leptotrichia_sp_oral_clone_EI013     | 0,05686789              |
| d__Bacteria; p__Bacteroidota; c__Bacteroidia; o__Flavobacteriales; f__Weeksellaceae; g__Bergeyella; s__uncultured_bacterium                         | 0,05947955              |
| d__Bacteria; p__Fusobacteriota; c__Fusobacteriia; o__Fusobacteriales; f__Leptotrichiaceae; g__Leptotrichia; s__Leptotrichia_sp_oral_clone_EI013     | 0,0743657               |
| d__Bacteria; p__Fusobacteriota; c__Fusobacteriia; o__Fusobacteriales; f__Leptotrichiaceae; g__Streptobacillus; s__Streptobacillus_hongkongensis     | 0,05576208              |
| d__Bacteria; p__Bacteroidota; c__Bacteroidia; o__Bacteroidales; f__Prevotellaceae; g__Alloprevotella                                                | 0,06899409              |
| d__Bacteria; p__Proteobacteria; c__Gammaproteobacteria; o__Burkholderiales; f__Neisseriaceae; g__Neisseria                                          | 0,07209778              |
| d__Bacteria; p__Bacteroidota; c__Bacteroidia; o__Bacteroidales; f__Prevotellaceae; g__Prevotella; s__Prevotella_sp_oral_taxon_299_str_F0039         | 0,04250356              |
| d__Bacteria; p__Firmicutes; c__Clostridia; o__Peptostreptococcales-Tissierellales; f__Peptostreptococcales-Tissierellales; g__Parvimonas            | 0,05037783              |
| d__Bacteria; p__Fusobacteriota; c__Fusobacteriia; o__Fusobacteriales; f__Fusobacteriaceae; g__Fusobacterium                                         | 0,04622103              |
| d__Bacteria; p__Bacteroidota; c__Bacteroidia; o__Bacteroidales; f__Porphyromonadaceae; g__Porphyromonas                                             | 0,10828625              |
| d__Bacteria; p__Patescibacteria; c__Gracilibacteria; o__Absconditabacteriales_(SR1); f__Absconditabacteriales_(SR1); g__Absconditabacteriales_(SR1) | 0,05873396              |
| d__Bacteria; p__Fusobacteriota; c__Fusobacteriia; o__Fusobacteriales; f__Leptotrichiaceae; g__Leptotrichia                                          | 0,05204028              |
| d__Bacteria; p__Fusobacteriota; c__Fusobacteriia; o__Fusobacteriales; f__Leptotrichiaceae; g__Streptobacillus; s__uncultured_bacterium              | 0,04089219              |
| d__Bacteria; p__Bacteroidota; c__Bacteroidia; o__Bacteroidales; f__Porphyromonadaceae; g__Porphyromonas                                             | 0,05249344              |
| d__Bacteria; p__Bacteroidota; c__Bacteroidia; o__Bacteroidales; f__Prevotellaceae; g__Prevotella                                                    | 0,04783288              |
| d__Bacteria; p__Proteobacteria; c__Gammaproteobacteria; o__Pasteurellales; f__Pasteurellaceae; g__Haemophilus                                       | 0,12274643              |
| d__Bacteria; p__Bacteroidota; c__Bacteroidia; o__Bacteroidales; f__Porphyromonadaceae; g__Porphyromonas; s__Porphyromonas_sp_oral_clone_DP023       | 0,05024276              |
| d__Bacteria; p__Bacteroidota; c__Bacteroidia; o__Bacteroidales; f__Prevotellaceae; g__Prevotella                                                    | 0,0813365               |
| d__Bacteria; p__Fusobacteriota; c__Fusobacteriia; o__Fusobacteriales; f__Leptotrichiaceae; g__Leptotrichia; s__Leptotrichia_sp_oral_clone_EI013     | 0,19247594              |
| d__Bacteria; p__Bacteroidota; c__Bacteroidia; o__Bacteroidales; f__Prevotellaceae; g__Alloprevotella                                                | 0,09888752              |
| d__Bacteria; p__Firmicutes; c__Bacilli; o__Lactobacillales                                                                                          | 0,03717472              |
| d__Bacteria; p__Bacteroidota; c__Bacteroidia; o__Bacteroidales; f__Prevotellaceae; g__Prevotella; s__Prevotella_pleuritidis                         | 0,04198153              |
| d__Bacteria; p__Proteobacteria; c__Gammaproteobacteria; o__Pasteurellales; f__Pasteurellaceae; g__Actinobacillus                                    | 0,13796173              |
| d__Bacteria; p__Firmicutes; c__Bacilli; o__Lactobacillales                                                                                          | 0,04730384              |
| d__Bacteria; p__Proteobacteria; c__Gammaproteobacteria; o__Pasteurellales; f__Pasteurellaceae                                                       | 0,03717472              |



|                                                                                                                                               |            |
|-----------------------------------------------------------------------------------------------------------------------------------------------|------------|
| d_Bacteria; p_Fusobacteriota; c_Fusobacteriia; o_Fusobacteriales; f_Leptotrichiaceae; g_Streptobacillus; s_uncultured_bacterium               | 0,06609556 |
| d_Bacteria; p_Firmicutes; c_Bacilli; o_Lactobacillales                                                                                        | 0,04855155 |
| d_Bacteria; p_Patescibacteria; c_Gracilibacteria; o_Absconditabacteriales_(SR1); f_Absconditabacteriales_(SR1); g_Absconditabacteriales_(SR1) | 0,03717472 |
| d_Bacteria; p_Bacteroidota; c_Bacteroidia; o_Bacteroidales; f_Prevotellaceae; g_Prevotella                                                    | 0,0713686  |
| d_Bacteria; p_Patescibacteria; c_Gracilibacteria; o_Absconditabacteriales_(SR1); f_Absconditabacteriales_(SR1); g_Absconditabacteriales_(SR1) | 0,04460967 |
| d_Bacteria; p_Bacteroidota; c_Bacteroidia; o_Bacteroidales; f_Prevotellaceae; g_Prevotella; s_Prevotella_sp._HJM029                           | 0,0521358  |
| d_Bacteria; p_Bacteroidota; c_Bacteroidia; o_Flavobacteriales; f_Weeksellaceae; g_Bergeyella; s_uncultured_bacterium                          | 0,03717472 |
| d_Bacteria; p_Actinobacteriota; c_Actinobacteria; o_Micrococcales; f_Micrococcaceae; g_Rothia; s_uncultured_organism                          | 0,03904863 |
| d_Bacteria; p_Bacteroidota; c_Bacteroidia; o_Bacteroidales; f_Porphyromonadaceae; g_Porphyromonas                                             | 0,12141992 |
| d_Bacteria; p_Firmicutes; c_Negativicutes; o_Veillonellales-Selenomonadales; f_Veillonellaceae; g_Veillonella                                 | 0,07428563 |
| d_Bacteria; p_Fusobacteriota; c_Fusobacteriia; o_Fusobacteriales; f_Leptotrichiaceae; g_Leptotrichia; s_Leptotrichia_sp._oral_clone_EI013     | 0,04804746 |
| d_Bacteria; p_Proteobacteria; c_Gammaproteobacteria; o_Pasteurellales; f_Pasteurellaceae; g_Haemophilus                                       | 0,05785295 |
| d_Bacteria; p_Proteobacteria; c_Gammaproteobacteria; o_Pasteurellales; f_Pasteurellaceae; g_Haemophilus                                       | 0,04978711 |
| d_Bacteria; p_Bacteroidota; c_Bacteroidia; o_Bacteroidales; f_Prevotellaceae; g_Prevotella; s_Prevotella_sp._GEJ23                            | 0,04733219 |
| d_Bacteria; p_Bacteroidota; c_Bacteroidia; o_Bacteroidales; f_Prevotellaceae; g_Prevotella                                                    | 0,18272081 |
| d_Bacteria; p_Fusobacteriota; c_Fusobacteriia; o_Fusobacteriales; f_Leptotrichiaceae; g_Streptobacillus; s_uncultured_bacterium               | 0,04129503 |
| d_Bacteria; p_Firmicutes; c_Negativicutes; o_Veillonellales-Selenomonadales; f_Veillonellaceae; g_Veillonella                                 | 0,12911846 |
| d_Bacteria; p_Bacteroidota; c_Bacteroidia; o_Bacteroidales; f_Prevotellaceae; g_Alloprevotella                                                | 0,04532344 |
| d_Bacteria; p_Patescibacteria; c_Gracilibacteria; o_Absconditabacteriales_(SR1); f_Absconditabacteriales_(SR1); g_Absconditabacteriales_(SR1) | 0,04089219 |
| d_Bacteria; p_Bacteroidota; c_Bacteroidia; o_Bacteroidales; f_Porphyromonadaceae; g_Porphyromonas                                             | 0,04305868 |
| d_Bacteria; p_Bacteroidota; c_Bacteroidia; o_Bacteroidales; f_Prevotellaceae; g_Prevotella; s_Prevotella_pleuritidis                          | 0,07990389 |
| d_Bacteria; p_Bacteroidota; c_Bacteroidia; o_Bacteroidales; f_Prevotellaceae; g_Prevotella; s_Prevotella_pleuritidis                          | 0,04641133 |
| d_Bacteria; p_Actinobacteriota; c_Actinobacteria; o_Micrococcales; f_Micrococcaceae; g_Rothia; s_uncultured_organism                          | 0,03904863 |
| d_Bacteria; p_Bacteroidota; c_Bacteroidia; o_Bacteroidales; f_Prevotellaceae; g_Prevotella                                                    | 0,06024096 |
| d_Bacteria; p_Bacteroidota; c_Bacteroidia; o_Bacteroidales; f_Porphyromonadaceae; g_Porphyromonas                                             | 0,12183483 |
| d_Bacteria; p_Fusobacteriota; c_Fusobacteriia; o_Fusobacteriales; f_Fusobacteriaceae; g_Fusobacterium                                         | 0,05517827 |
| d_Bacteria; p_Fusobacteriota; c_Fusobacteriia; o_Fusobacteriales; f_Leptotrichiaceae; g_Leptotrichia; s_Leptotrichia_sp._oral_clone_EI013     | 0,15310586 |
| d_Bacteria; p_Firmicutes; c_Bacilli; o_Staphylococcales; f_Gemellaceae; g_Gemella                                                             | 0,04115793 |
| d_Bacteria; p_Fusobacteriota; c_Fusobacteriia; o_Fusobacteriales; f_Leptotrichiaceae; g_Leptotrichia; s_Leptotrichia_sp._oral_clone_EI013     | 0,31496063 |
| d_Bacteria; p_Fusobacteriota; c_Fusobacteriia; o_Fusobacteriales; f_Fusobacteriaceae; g_Fusobacterium                                         | 0,0466893  |

|                                                                                                                                                     |            |
|-----------------------------------------------------------------------------------------------------------------------------------------------------|------------|
| d__Bacteria; p__Proteobacteria; c__Gammaproteobacteria; o__Pasteurellales; f__Pasteurellaceae; g__Haemophilus                                       | 0,04270476 |
| d__Bacteria; p__Fusobacteriota; c__Fusobacteriia; o__Fusobacteriales; f__Leptotrichiaceae; g__Streptobacillus; s__uncultured_bacterium              | 0,07724167 |
| d__Bacteria; p__Bacteroidota; c__Bacteroidia; o__Bacteroidales; f__Prevotellaceae; g__Alloprevotella                                                | 0,09064689 |
| d__Bacteria; p__Patascibacteria; c__Gracilibacteria; o__Absconditabacteriales (SR1); f__Absconditabacteriales (SR1); g__Absconditabacteriales (SR1) | 0,07806691 |
| d__Bacteria; p__Fusobacteriota; c__Fusobacteriia; o__Fusobacteriales; f__Leptotrichiaceae; g__Streptobacillus; s__uncultured_bacterium              | 0,05178439 |
| d__Bacteria; p__Firmicutes; c__Bacilli; o__Lactobacillales; f__Streptococcaceae; g__Streptococcus                                                   | 0,04259851 |
| d__Bacteria; p__Fusobacteriota; c__Fusobacteriia; o__Fusobacteriales; f__Fusobacteriaceae; g__Fusobacterium                                         | 0,05897546 |
| d__Bacteria; p__Firmicutes; c__Bacilli; o__Lactobacillales; f__Streptococcaceae; g__Streptococcus                                                   | 0,19426314 |
| d__Bacteria; p__Bacteroidota; c__Bacteroidia; o__Bacteroidales; f__Prevotellaceae; g__Alloprevotella; s__Prevotella_sp.                             | 0,04360078 |

**Mean  
relative  
abundance**

**ASV FOUND ONLY IN COTROLS**

|                                                                                                                                               |            |
|-----------------------------------------------------------------------------------------------------------------------------------------------|------------|
| d__Bacteria; p__Fusobacteriota; c__Fusobacteriia; o__Fusobacteriales; f__Leptotrichiaceae; g__uncultured; Ambiguous_taxa                      | 0,01877441 |
| d__Bacteria; p__Fusobacteriota; c__Fusobacteriia; o__Fusobacteriales; f__Fusobacteriaceae; g__Fusobacterium                                   | 0,01959908 |
| d__Bacteria; p__Proteobacteria; c__Gammaproteobacteria; o__Pasteurellales; f__Pasteurellaceae                                                 | 0,02065185 |
| d__Bacteria; p__Bacteroidota; c__Bacteroidia; o__Bacteroidales; f__Prevotellaceae; g__Prevotella; s__Prevotella_veroralis                     | 0,02070908 |
| d__Bacteria; p__Actinobacteriota; c__Coriobacteriia; o__Coriobacteriales; f__Atopobiaceae; g__Atopobium; s__uncultured_organism               | 0,02070908 |
| d__Bacteria; p__Proteobacteria; c__Gammaproteobacteria; o__Pasteurellales; f__Pasteurellaceae                                                 | 0,02252929 |
| d__Bacteria; p__Proteobacteria; c__Gammaproteobacteria; o__Pasteurellales; f__Pasteurellaceae                                                 | 0,02282688 |
| d__Bacteria; p__Firmicutes; c__Bacilli; o__Erysipelotrichales; f__Erysipelotrichaceae; g__Solobacterium; s__Solobacterium_moorei              | 0,02290685 |
| d__Bacteria; p__Bacteroidota; c__Bacteroidia; o__Bacteroidales; f__Prevotellaceae; g__Alloprevotella; s__Prevotella_sp.                       | 0,02302026 |
| d__Bacteria; p__Firmicutes; c__Bacilli; o__Lactobacillales; f__Streptococcaceae; g__Streptococcus                                             | 0,02302026 |
| d__Bacteria; p__Bacteroidota; c__Bacteroidia; o__Bacteroidales; f__Prevotellaceae; g__Prevotella; s__Prevotella_sp._oral_taxon_299_str._F0039 | 0,02302026 |
| d__Bacteria; p__Firmicutes; c__Bacilli; o__Lactobacillales                                                                                    | 0,02316272 |
| d__Bacteria; p__Bacteroidota; c__Bacteroidia; o__Bacteroidales; f__Prevotellaceae; g__Alloprevotella; s__Prevotella_sp.                       | 0,02351355 |
| d__Bacteria; p__Firmicutes; c__Clostridia; o__Peptococcales; f__Peptococcaceae; g__Peptococcus; Ambiguous_taxa                                | 0,02382984 |
| d__Bacteria; p__Bacteroidota; c__Bacteroidia; o__Bacteroidales; f__Prevotellaceae; g__Prevotella; s__Prevotella_sp._oral_taxon_299_str._F0039 | 0,02389626 |
| d__Bacteria; p__Campilobacterota; c__Campylobacteria; o__Campylobacterales; f__Campylobacteraceae; g__Campylobacter                           | 0,02393549 |
| d__Bacteria; p__Firmicutes; c__Clostridia; o__Lachnospirales; f__Lachnospiraceae; g__Oribacterium                                             | 0,0239499  |

|                                                                                                                                                                                      |            |
|--------------------------------------------------------------------------------------------------------------------------------------------------------------------------------------|------------|
| d__Bacteria; p__Bacteroidota; c__Bacteroidia; o__Bacteroidales; f__Porphyromonadaceae; g__Porphyromonas; s__unidentified                                                             | 0,02424084 |
| d__Bacteria; p__Firmicutes; c__Negativicutes; o__Veillonellales-Selenomonadales; f__Veillonellaceae; g__Veillonella                                                                  | 0,02448236 |
| d__Bacteria; p__Bacteroidota; c__Bacteroidia; o__Bacteroidales; f__Prevotellaceae; g__Prevotella; s__Prevotella_nigrescens                                                           | 0,02455106 |
| d__Bacteria; p__Bacteroidota; c__Bacteroidia; o__Bacteroidales; f__Prevotellaceae; g__Prevotella; s__Prevotella_pallens                                                              | 0,02466456 |
| d__Bacteria; p__Patescibacteria; c__Gracilibacteria; o__Absconditabacteriales_(SR1); f__Absconditabacteriales_(SR1); g__Absconditabacteriales_(SR1); s__SR1_bacterium_oral_taxon_875 | 0,02466456 |
| d__Bacteria; p__Firmicutes; c__Bacilli; o__Lactobacillales; f__Streptococcaceae; g__Streptococcus                                                                                    | 0,02485089 |
| d__Bacteria; p__Firmicutes; c__Bacilli; o__Staphylococcales; f__Gemellaceae; g__Gemella                                                                                              | 0,02494957 |
| d__Bacteria; p__Firmicutes; c__Clostridia; o__Lachnospirales; f__Lachnospiraceae; g__Oribacterium                                                                                    | 0,0253033  |
| d__Bacteria; p__Firmicutes; c__Negativicutes; o__Veillonellales-Selenomonadales; f__Veillonellaceae; g__Veillonella                                                                  | 0,02554148 |
| d__Bacteria; p__Proteobacteria; c__Gammaproteobacteria; o__Burkholderiales; f__Neisseriaceae                                                                                         | 0,02554148 |
| d__Bacteria; p__Firmicutes; c__Bacilli; o__Lactobacillales; f__Streptococcaceae                                                                                                      | 0,02556973 |
| d__Bacteria; p__Firmicutes; c__Bacilli; o__Lactobacillales                                                                                                                           | 0,02559423 |
| d__Bacteria; p__Firmicutes; c__Negativicutes; o__Veillonellales-Selenomonadales; f__Veillonellaceae; g__Veillonella                                                                  | 0,02566074 |
| d__Bacteria; p__Bacteroidota; c__Bacteroidia; o__Flavobacteriales; f__Weeksellaceae; g__Bergeyella; s__uncultured_Bergeyella_sp.                                                     | 0,02569897 |
| d__Bacteria; p__Bacteroidota; c__Bacteroidia; o__Bacteroidales; f__Prevotellaceae; g__Alloprevotella; s__Prevotella_sp.                                                              | 0,02588666 |
| d__Bacteria; p__Bacteroidota; c__Bacteroidia; o__Bacteroidales; f__Prevotellaceae; g__Prevotella; s__Prevotella_nigrescens                                                           | 0,02596609 |
| d__Bacteria; p__Actinobacteriota; c__Coriobacteriia; o__Coriobacteriales; f__Atopobiaceae; g__Atopobium                                                                              | 0,02611709 |
| d__Bacteria; p__Firmicutes; c__Negativicutes; o__Veillonellales-Selenomonadales; f__Veillonellaceae; g__Veillonella                                                                  | 0,02617574 |
| d__Bacteria; p__Fusobacteriota; c__Fusobacteriia; o__Fusobacteriales; f__Leptotrichiaceae; g__uncultured; Ambiguous_taxa                                                             | 0,02628417 |
| d__Bacteria; p__Fusobacteriota; c__Fusobacteriia; o__Fusobacteriales; f__Fusobacteriaceae; g__Fusobacterium                                                                          | 0,02629264 |
| d__Bacteria; p__Bacteroidota; c__Bacteroidia; o__Bacteroidales; f__Prevotellaceae; g__Alloprevotella                                                                                 | 0,02649186 |
| d__Bacteria; p__Firmicutes; c__Negativicutes; o__Veillonellales-Selenomonadales; f__Selenomonadaceae; g__Selenomonas                                                                 | 0,02649418 |
| d__Bacteria; p__Firmicutes; c__Clostridia; o__Peptostreptococcales-Tissierellales; f__Anaerovoracaceae; g__[Eubacterium]_nodatum_group; s__[Eubacterium]_infirmum                    | 0,02655637 |
| d__Bacteria; p__Firmicutes; c__Negativicutes; o__Veillonellales-Selenomonadales; f__Veillonellaceae; g__Veillonella                                                                  | 0,02657151 |
| d__Bacteria; p__Fusobacteriota; c__Fusobacteriia; o__Fusobacteriales; f__Leptotrichiaceae; g__Leptotrichia                                                                           | 0,02665675 |
| d__Bacteria; p__Campilobacterota; c__Campylobacteriia; o__Campylobacteriales; f__Campylobacteraceae; g__Campylobacter; s__uncultured_organism                                        | 0,02666382 |
| d__Bacteria; p__Proteobacteria; c__Gammaproteobacteria; o__Burkholderiales; f__Neisseriaceae; g__Neisseria; s__Neisseria_flavescens                                                  | 0,02673017 |
| d__Bacteria; p__Fusobacteriota; c__Fusobacteriia; o__Fusobacteriales; f__Fusobacteriaceae; g__Fusobacterium                                                                          | 0,0268634  |
| d__Bacteria; p__Bacteroidota; c__Bacteroidia; o__Flavobacteriales; f__Weeksellaceae; g__Bergeyella; s__uncultured_Bergeyella_sp.                                                     | 0,02698296 |

|                                                                                                                                                                   |            |
|-------------------------------------------------------------------------------------------------------------------------------------------------------------------|------------|
| d__Bacteria; p__Bacteroidota; c__Bacteroidia; o__Bacteroidales; f__Porphyromonadaceae; g__Porphyromonas; s__Porphyromonas_gingivalis                              | 0,02702118 |
| d__Bacteria; p__Firmicutes; c__Bacilli; o__Mycoplasmatales; f__Mycoplasmataceae; g__Mycoplasma                                                                    | 0,02702118 |
| d__Bacteria; p__Fusobacteriota; c__Fusobacteriia; o__Fusobacteriales; f__Fusobacteriaceae; g__Fusobacterium                                                       | 0,02705005 |
| d__Bacteria; p__Fusobacteriota; c__Fusobacteriia; o__Fusobacteriales; f__Fusobacteriaceae; g__Fusobacterium                                                       | 0,02705918 |
| d__Bacteria; p__Firmicutes; c__Negativicutes; o__Veillonellales-Selenomonadales; f__Veillonellaceae; g__Veillonella                                               | 0,02728175 |
| d__Bacteria; p__Bacteroidota; c__Bacteroidia; o__Bacteroidales; f__Prevotellaceae; g__Prevotella; s__Prevotella_veroralis                                         | 0,02734681 |
| d__Bacteria; p__Bacteroidota; c__Bacteroidia; o__Bacteroidales; f__Prevotellaceae; g__Prevotella; s__Prevotella_sp._GEJ23                                         | 0,02735181 |
| d__Bacteria; p__Bacteroidota; c__Bacteroidia; o__Bacteroidales; f__Porphyromonadaceae; g__Porphyromonas; s__Porphyromonas_sp._oral_clone_DP023                    | 0,02743376 |
| d__Bacteria; p__Bacteroidota; c__Bacteroidia; o__Flavobacteriales; f__Weeksellaceae; g__Bergeyella; s__uncultured_Bergeyella_sp.                                  | 0,02754276 |
| d__Bacteria; p__Bacteroidota; c__Bacteroidia; o__Bacteroidales; f__Prevotellaceae; g__Alloprevotella; s__Prevotella_sp.                                           | 0,02755977 |
| d__Bacteria; p__Actinobacteriota; c__Actinobacteria; o__Micrococcales; f__Micrococcaceae; g__Rothia; s__uncultured_bacterium                                      | 0,02763431 |
| d__Bacteria; p__Bacteroidota; c__Bacteroidia; o__Bacteroidales; f__Prevotellaceae; g__Prevotella; s__Prevotella_sp._oral_taxon_299_str._F0039                     | 0,02763758 |
| d__Bacteria; p__Fusobacteriota; c__Fusobacteriia; o__Fusobacteriales; f__Fusobacteriaceae; g__Fusobacterium                                                       | 0,02767008 |
| d__Bacteria; p__Firmicutes; c__Negativicutes; o__Veillonellales-Selenomonadales; f__Veillonellaceae; g__Veillonella                                               | 0,02790179 |
| d__Bacteria; p__Bacteroidota; c__Bacteroidia; o__Bacteroidales; f__Porphyromonadaceae; g__Porphyromonas                                                           | 0,02805921 |
| d__Bacteria; p__Proteobacteria; c__Gammaproteobacteria; o__Pasteurellales; f__Pasteurellaceae; g__Actinobacillus                                                  | 0,02809563 |
| d__Bacteria; p__Bacteroidota; c__Bacteroidia; o__Bacteroidales; f__Prevotellaceae; g__Prevotella; s__Prevotella_pallens                                           | 0,02859687 |
| d__Bacteria; p__Firmicutes; c__Bacilli; o__Staphylococcales; f__Gemellaceae; g__Gemella                                                                           | 0,02878364 |
| d__Bacteria; p__Bacteroidota; c__Bacteroidia; o__Bacteroidales; f__Prevotellaceae; g__Prevotella; s__Prevotella_pallens                                           | 0,02922248 |
| d__Bacteria; p__Firmicutes; c__Bacilli; o__Lactobacillales; f__Streptococcaceae                                                                                   | 0,02938146 |
| d__Bacteria; p__Fusobacteriota; c__Fusobacteriia; o__Fusobacteriales; f__Leptotrichiaceae; g__uncultured; Ambiguous_taxa                                          | 0,02946218 |
| d__Bacteria; p__Campilobacterota; c__Campylobacteria; o__Campylobacterales; f__Campylobacteraceae; g__Campylobacter                                               | 0,02959747 |
| d__Bacteria; p__Firmicutes; c__Negativicutes; o__Veillonellales-Selenomonadales; f__Veillonellaceae; g__Megasphaera; s__Megasphaera_micronuciformis               | 0,02963785 |
| d__Bacteria; p__Proteobacteria; c__Gammaproteobacteria; o__Pasteurellales; f__Pasteurellaceae                                                                     | 0,02971288 |
| d__Bacteria; p__Firmicutes; c__Negativicutes; o__Veillonellales-Selenomonadales; f__Veillonellaceae; g__Veillonella                                               | 0,02971327 |
| d__Bacteria; p__Firmicutes; c__Clostridia; o__Peptostreptococcales-Tissierellales; f__Anaerovoracaceae; g__[Eubacterium]_nodatum_group; s__[Eubacterium]_infirmum | 0,02975154 |
| d__Bacteria; p__Firmicutes; c__Bacilli; o__Lactobacillales; f__Streptococcaceae; g__Streptococcus                                                                 | 0,0299263  |
| d__Bacteria; p__Firmicutes; c__Bacilli; o__Lactobacillales; f__Streptococcaceae; g__Streptococcus                                                                 | 0,02995643 |
| d__Bacteria; p__Bacteroidota; c__Bacteroidia; o__Bacteroidales; f__Prevotellaceae; g__Prevotella; s__Prevotella_veroralis                                         | 0,03005161 |

|                                                                                                                                                                                      |            |
|--------------------------------------------------------------------------------------------------------------------------------------------------------------------------------------|------------|
| d__Bacteria; p__Bacteroidota; c__Bacteroidia; o__Bacteroidales; f__Prevotellaceae; g__Prevotella; s__Prevotella_sp._GEJ23                                                            | 0,03006253 |
| d__Bacteria; p__Firmicutes; c__Clostridia; o__Peptostreptococcales-Tissierellales; f__Peptostreptococcaceae; g__Filifactor; Ambiguous_taxa                                           | 0,03006253 |
| d__Bacteria; p__Firmicutes; c__Negativicutes; o__Veillonellales-Selenomonadales; f__Veillonellaceae; g__Veillonella                                                                  | 0,03008279 |
| d__Bacteria; p__Bacteroidota; c__Bacteroidia; o__Bacteroidales; f__Prevotellaceae; g__Alloprevotella; s__Prevotella_sp._oral_clone_BU035                                             | 0,03009148 |
| d__Bacteria; p__Bacteroidota; c__Bacteroidia; o__Bacteroidales; f__Prevotellaceae; g__Alloprevotella; s__Prevotella_sp._oral_clone_BU035                                             | 0,03009148 |
| d__Bacteria; p__Bacteroidota; c__Bacteroidia; o__Bacteroidales; f__Prevotellaceae; g__Alloprevotella; s__Prevotella_sp._oral_clone_BU035                                             | 0,03009148 |
| d__Bacteria; p__Firmicutes; c__Bacilli; o__Lactobacillales; f__Streptococcaceae; g__Streptococcus                                                                                    | 0,03014029 |
| d__Bacteria; p__Firmicutes; c__Bacilli; o__Lactobacillales; f__Streptococcaceae; g__Streptococcus                                                                                    | 0,03014029 |
| d__Bacteria; p__Firmicutes; c__Bacilli; o__Lactobacillales                                                                                                                           | 0,03020531 |
| d__Bacteria; p__Bacteroidota; c__Bacteroidia; o__Flavobacteriales; f__Weeksellaceae; g__Bergeyella; s__uncultured_bacterium                                                          | 0,03023354 |
| d__Bacteria; p__Fusobacteriota; c__Fusobacteriia; o__Fusobacteriales; f__Fusobacteriaceae; g__Fusobacterium                                                                          | 0,03030594 |
| d__Bacteria; p__Bacteroidota; c__Bacteroidia; o__Bacteroidales; f__Prevotellaceae; g__Prevotella; s__Prevotella_pallens                                                              | 0,03040758 |
| d__Bacteria; p__Bacteroidota; c__Bacteroidia; o__Bacteroidales; f__Prevotellaceae; g__Prevotella; s__Prevotella_sp._oral_taxon_299_str._F0039                                        | 0,03046297 |
| d__Bacteria; p__Bacteroidota; c__Bacteroidia; o__Bacteroidales; f__Prevotellaceae; g__Alloprevotella; s__Alloprevotella_tanneriae                                                    | 0,0307384  |
| d__Bacteria; p__Fusobacteriota; c__Fusobacteriia; o__Fusobacteriales; f__Leptotrichiaceae; g__Leptotrichia                                                                           | 0,03109264 |
| d__Bacteria; p__Campilobacterota; c__Campylobacteria; o__Campylobacterales; f__Campylobacteraceae; g__Campylobacter; s__uncultured_organism                                          | 0,03110608 |
| d__Bacteria; p__Proteobacteria; c__Gammaproteobacteria; o__Pasteurellales; f__Pasteurellaceae                                                                                        | 0,03133479 |
| d__Bacteria; p__Firmicutes; c__Clostridia; o__Lachnospirales; f__Lachnospiraceae; g__Lachnoanaerobaculum                                                                             | 0,03150786 |
| d__Bacteria; p__Fusobacteriota; c__Fusobacteriia; o__Fusobacteriales; f__Leptotrichiaceae; g__Leptotrichia                                                                           | 0,03154387 |
| d__Bacteria; p__Bacteroidota; c__Bacteroidia; o__Bacteroidales; f__Porphyromonadaceae; g__Porphyromonas; s__unidentified                                                             | 0,03158753 |
| d__Bacteria; p__Bacteroidota; c__Bacteroidia; o__Bacteroidales; f__Prevotellaceae; g__Alloprevotella                                                                                 | 0,03160641 |
| d__Bacteria; p__Bacteroidota; c__Bacteroidia; o__Bacteroidales; f__Prevotellaceae; g__Alloprevotella                                                                                 | 0,03162344 |
| d__Bacteria; p__Fusobacteriota; c__Fusobacteriia; o__Fusobacteriales; f__Fusobacteriaceae; g__Fusobacterium                                                                          | 0,03162393 |
| d__Bacteria; p__Bacteroidota; c__Bacteroidia; o__Bacteroidales; f__Porphyromonadaceae; g__Porphyromonas; s__unidentified                                                             | 0,03170422 |
| d__Bacteria; p__Firmicutes; c__Bacilli; o__Erysipelotrichales; f__Erysipelotrichaceae; g__Solobacterium; s__Solobacterium_moorei                                                     | 0,03192926 |
| d__Bacteria; p__Bacteroidota; c__Bacteroidia; o__Bacteroidales; f__Prevotellaceae; g__Prevotella; s__Prevotella_sp._GEJ23                                                            | 0,03195763 |
| d__Bacteria; p__Patescibacteria; c__Gracilibacteria; o__Absconditabacteriales_(SR1); f__Absconditabacteriales_(SR1); g__Absconditabacteriales_(SR1); s__SR1_bacterium_oral_taxon_875 | 0,03206393 |
| d__Bacteria; p__Bacteroidota; c__Bacteroidia; o__Bacteroidales; f__Paludibacteraceae; g__F0058; Ambiguous_taxa                                                                       | 0,03213637 |
| d__Bacteria; p__Campilobacterota; c__Campylobacteria; o__Campylobacterales; f__Campylobacteraceae; g__Campylobacter                                                                  | 0,03221343 |

|                                                                                                                                                     |            |
|-----------------------------------------------------------------------------------------------------------------------------------------------------|------------|
| d__Bacteria; p__Firmicutes; c__Bacilli; o__Mycoplasmatales; f__Mycoplasmataceae; g__Mycoplasma                                                      | 0,03222192 |
| d__Bacteria; p__Firmicutes; c__Negativicutes; o__Veillonellales-Selenomonadales; f__Veillonellaceae; g__Veillonella                                 | 0,03224206 |
| d__Bacteria; p__Campilobacterota; c__Campylobacteria; o__Campylobacterales; f__Campylobacteraceae; g__Campylobacter; s__unidentified                | 0,03228583 |
| d__Bacteria; p__Firmicutes; c__Negativicutes; o__Veillonellales-Selenomonadales; f__Veillonellaceae; g__Veillonella                                 | 0,03236928 |
| d__Bacteria; p__Fusobacteriota; c__Fusobacteriia; o__Fusobacteriales; f__Fusobacteriaceae; g__Fusobacterium                                         | 0,03260373 |
| d__Bacteria; p__Fusobacteriota; c__Fusobacteriia; o__Fusobacteriales; f__Fusobacteriaceae; g__Fusobacterium                                         | 0,03262663 |
| d__Bacteria; p__Bacteroidota; c__Bacteroidia; o__Bacteroidales; f__Prevotellaceae; g__Prevotella; s__Prevotella_veroralis                           | 0,03267974 |
| d__Bacteria; p__Bacteroidota; c__Bacteroidia; o__Bacteroidales; f__Porphyromonadaceae; g__Porphyromonas; s__Porphyromonas_sp._oral_clone_DP023      | 0,03293872 |
| d__Bacteria; p__Fusobacteriota; c__Fusobacteriia; o__Fusobacteriales; f__Fusobacteriaceae; g__Fusobacterium; s__Fusobacterium_sp._Marseille-P2749   | 0,03306878 |
| d__Bacteria; p__Fusobacteriota; c__Fusobacteriia; o__Fusobacteriales; f__Fusobacteriaceae; g__Fusobacterium                                         | 0,03313453 |
| d__Bacteria; p__Bacteroidota; c__Bacteroidia; o__Bacteroidales; f__Prevotellaceae; g__Prevotella; s__Prevotella_veroralis                           | 0,03322622 |
| d__Bacteria; p__Proteobacteria; c__Gammaproteobacteria; o__Burkholderiales; f__Neisseriaceae; g__Neisseria                                          | 0,03342698 |
| d__Bacteria; p__Bacteroidota; c__Bacteroidia; o__Bacteroidales; f__Porphyromonadaceae; g__Porphyromonas                                             | 0,03389701 |
| d__Bacteria; p__Firmicutes; c__Negativicutes; o__Veillonellales-Selenomonadales; f__Veillonellaceae; g__Veillonella                                 | 0,03393039 |
| d__Bacteria; p__Campilobacterota; c__Campylobacteria; o__Campylobacterales; f__Campylobacteraceae; g__Campylobacter                                 | 0,03398917 |
| d__Bacteria; p__Proteobacteria; c__Gammaproteobacteria; o__Burkholderiales; f__Neisseriaceae; g__Neisseria                                          | 0,03402022 |
| d__Bacteria; p__Firmicutes; c__Negativicutes; o__Veillonellales-Selenomonadales; f__Veillonellaceae; g__Veillonella                                 | 0,03413094 |
| d__Bacteria; p__Bacteroidota; c__Bacteroidia; o__Bacteroidales; f__Porphyromonadaceae; g__Porphyromonas; s__Porphyromonas_gingivalis                | 0,03425023 |
| d__Bacteria; p__Bacteroidota; c__Bacteroidia; o__Bacteroidales; f__Prevotellaceae; g__Prevotella; s__Prevotella_sp._GEJ23                           | 0,03453039 |
| d__Bacteria; p__Bacteroidota; c__Bacteroidia; o__Bacteroidales; f__Prevotellaceae; g__Prevotella; s__Prevotella_sp._oral_taxon_299_str._F0039       | 0,03456547 |
| d__Bacteria; p__Bacteroidota; c__Bacteroidia; o__Bacteroidales; f__Prevotellaceae; g__Prevotella                                                    | 0,03474434 |
| d__Bacteria; p__Proteobacteria; c__Gammaproteobacteria; o__Burkholderiales; f__Neisseriaceae; g__Neisseria                                          | 0,03485778 |
| d__Bacteria; p__Campilobacterota; c__Campylobacteria; o__Campylobacterales; f__Campylobacteraceae; g__Campylobacter; s__uncultured_organism         | 0,03507833 |
| d__Bacteria; p__Proteobacteria; c__Gammaproteobacteria; o__Pasteurellales; f__Pasteurellaceae                                                       | 0,03517269 |
| d__Bacteria; p__Bacteroidota; c__Bacteroidia; o__Bacteroidales; f__Prevotellaceae; g__Prevotella; s__Prevotella_sp._oral_taxon_299_str._F0039       | 0,03520543 |
| d__Bacteria; p__Firmicutes; c__Negativicutes; o__Veillonellales-Selenomonadales; f__Veillonellaceae; g__Veillonella                                 | 0,03525023 |
| d__Bacteria; p__Bacteroidota; c__Bacteroidia; o__Bacteroidales; f__Prevotellaceae; g__Alloprevotella                                                | 0,03530095 |
| d__Bacteria; p__Fusobacteriota; c__Fusobacteriia; o__Fusobacteriales; f__Fusobacteriaceae; g__Fusobacterium                                         | 0,03535147 |
| d__Bacteria; p__Bacteroidota; c__Bacteroidia; o__Bacteroidales; f__Prevotellaceae; g__Prevotella; s__Prevotella_sp._oral_taxon_299_str._F0039       | 0,0354188  |
| d__Bacteria; p__Firmicutes; c__Negativicutes; o__Veillonellales-Selenomonadales; f__Veillonellaceae; g__Megasphaera; s__Megasphaera_micronuciformis | 0,03562034 |

|                                                                                                                                                     |            |
|-----------------------------------------------------------------------------------------------------------------------------------------------------|------------|
| d__Bacteria; p__Firmicutes; c__Bacilli; o__Lactobacillales; f__Streptococcaceae; g__Streptococcus                                                   | 0,0357296  |
| d__Bacteria; p__Bacteroidota; c__Bacteroidia; o__Bacteroidales; f__Prevotellaceae; g__Alloprevotella; s__Prevotella_sp.                             | 0,03574713 |
| d__Bacteria; p__Proteobacteria; c__Gammaproteobacteria; o__Pasteurellales; f__Pasteurellaceae; g__Actinobacillus                                    | 0,03575807 |
| d__Bacteria; p__Proteobacteria; c__Gammaproteobacteria; o__Pasteurellales; f__Pasteurellaceae; g__Actinobacillus                                    | 0,03575807 |
| d__Bacteria; p__Proteobacteria; c__Gammaproteobacteria; o__Burkholderiales; f__Neisseriaceae; g__Neisseria                                          | 0,03590205 |
| d__Bacteria; p__Firmicutes; c__Clostridia; o__Peptostreptococcales-Tissierellales; f__Peptostreptococcaceae; g__Peptostreptococcus                  | 0,03604943 |
| d__Bacteria; p__Bacteroidota; c__Bacteroidia; o__Bacteroidales; f__Porphyromonadaceae; g__Porphyromonas; s__Porphyromonas_sp._oral_clone_DP023      | 0,03605803 |
| d__Bacteria; p__Campilobacterota; c__Campylobacteria; o__Campylobacterales; f__Campylobacteraceae; g__Campylobacter; s__unidentified                | 0,03619019 |
| d__Bacteria; p__Bacteroidota; c__Bacteroidia; o__Bacteroidales; f__Porphyromonadaceae; g__Porphyromonas; s__Porphyromonas_sp._oral_clone_DP023      | 0,03624017 |
| d__Bacteria; p__Bacteroidota; c__Bacteroidia; o__Bacteroidales; f__Prevotellaceae; g__Alloprevotella; s__Prevotella_sp._oral_clone_BU035            | 0,03644122 |
| d__Bacteria; p__Proteobacteria; c__Gammaproteobacteria; o__Burkholderiales; f__Neisseriaceae                                                        | 0,03649525 |
| d__Bacteria; p__Firmicutes; c__Clostridia; o__Lachnospirales; f__Lachnospiraceae; g__Stomatobaculum                                                 | 0,0366426  |
| d__Bacteria; p__Bacteroidota; c__Bacteroidia; o__Bacteroidales; f__Prevotellaceae; g__Alloprevotella                                                | 0,03667755 |
| d__Bacteria; p__Fusobacteriota; c__Fusobacteriia; o__Fusobacteriales; f__Leptotrichiaceae; g__Leptotrichia; s__Leptotrichia_sp._oral_clone_FP036    | 0,03669053 |
| d__Bacteria; p__Firmicutes; c__Negativicutes; o__Veillonellales-Selenomonadales; f__Veillonellaceae; g__Veillonella                                 | 0,03677652 |
| d__Bacteria; p__Proteobacteria; c__Gammaproteobacteria; o__Pasteurellales; f__Pasteurellaceae; g__Haemophilus                                       | 0,03717267 |
| d__Bacteria; p__Firmicutes; c__Negativicutes; o__Veillonellales-Selenomonadales; f__Veillonellaceae; g__Veillonella                                 | 0,03718017 |
| d__Bacteria; p__Fusobacteriota; c__Fusobacteriia; o__Fusobacteriales; f__Fusobacteriaceae; g__Fusobacterium                                         | 0,03718682 |
| d__Bacteria; p__Bacteroidota; c__Bacteroidia; o__Bacteroidales; f__Prevotellaceae; g__Prevotella; s__Prevotella_pallens                             | 0,03748437 |
| d__Bacteria; p__Bacteroidota; c__Bacteroidia; o__Bacteroidales; f__Prevotellaceae; g__Prevotella; s__Prevotella_sp._oral_taxon_299_str._F0039       | 0,03793645 |
| d__Bacteria; p__Bacteroidota; c__Bacteroidia; o__Bacteroidales; f__Prevotellaceae; g__Alloprevotella; s__Prevotella_sp.                             | 0,03828275 |
| d__Bacteria; p__Firmicutes; c__Bacilli; o__Lactobacillales; f__Streptococcaceae; g__Streptococcus                                                   | 0,03851577 |
| d__Bacteria; p__Bacteroidota; c__Bacteroidia; o__Bacteroidales; f__Prevotellaceae; g__Prevotella; s__Prevotella_sp._oral_taxon_299_str._F0039       | 0,03866618 |
| d__Bacteria; p__Proteobacteria; c__Gammaproteobacteria; o__Burkholderiales; f__Neisseriaceae; g__Neisseria                                          | 0,0387807  |
| d__Bacteria; p__Firmicutes; c__Negativicutes; o__Veillonellales-Selenomonadales; f__Veillonellaceae; g__Veillonella                                 | 0,03879835 |
| d__Bacteria; p__Bacteroidota; c__Bacteroidia; o__Bacteroidales; f__Porphyromonadaceae; g__Porphyromonas; s__Porphyromonas_sp._oral_clone_DP023      | 0,03894593 |
| d__Bacteria; p__Firmicutes; c__Negativicutes; o__Veillonellales-Selenomonadales; f__Veillonellaceae; g__Megasphaera; s__Megasphaera_micronuciformis | 0,03932313 |
| d__Bacteria; p__Bacteroidota; c__Bacteroidia; o__Bacteroidales; f__Prevotellaceae; g__Alloprevotella; s__Prevotella_sp.                             | 0,03945707 |
| d__Bacteria; p__Fusobacteriota; c__Fusobacteriia; o__Fusobacteriales; f__Fusobacteriaceae; g__Fusobacterium                                         | 0,04028449 |
| d__Bacteria; p__Fusobacteriota; c__Fusobacteriia; o__Fusobacteriales; f__Fusobacteriaceae; g__Fusobacterium                                         | 0,04049081 |

|                                                                                                                                                                                      |            |
|--------------------------------------------------------------------------------------------------------------------------------------------------------------------------------------|------------|
| d__Bacteria; p__Proteobacteria; c__Gammaproteobacteria; o__Pasteurellales; f__Pasteurellaceae; g__Actinobacillus                                                                     | 0,04086637 |
| d__Bacteria; p__Proteobacteria; c__Gammaproteobacteria; o__Burkholderiales; f__Neisseriaceae; g__Neisseria                                                                           | 0,04131026 |
| d__Bacteria; p__Firmicutes; c__Bacilli; o__Lactobacillales; f__Streptococcaceae; g__Streptococcus                                                                                    | 0,04167411 |
| d__Bacteria; p__Firmicutes; c__Clostridia; o__Peptostreptococcales-Tissierellales; f__Peptostreptococcaceae; g__Filifactor; Ambiguous_taxa                                           | 0,04171339 |
| d__Bacteria; p__Bacteroidota; c__Bacteroidia; o__Bacteroidales; f__Prevotellaceae; g__Prevotella; s__Prevotella_sp._oral_taxon_299_str._F0039                                        | 0,0418046  |
| d__Bacteria; p__Firmicutes; c__Bacilli; o__Lactobacillales; f__Streptococcaceae; g__Streptococcus                                                                                    | 0,04187209 |
| d__Bacteria; p__Patescibacteria; c__Gracilibacteria; o__Absconditabacteriales_(SR1); f__Absconditabacteriales_(SR1); g__Absconditabacteriales_(SR1); s__SR1_bacterium_oral_taxon_875 | 0,04192976 |
| d__Bacteria; p__Firmicutes; c__Negativicutes; o__Veillonellales-Selenomonadales; f__Veillonellaceae; g__Megasphaera; s__Megasphaera_micronuciformis                                  | 0,04225621 |
| d__Bacteria; p__Firmicutes; c__Negativicutes; o__Veillonellales-Selenomonadales; f__Veillonellaceae; g__Megasphaera; s__Megasphaera_micronuciformis                                  | 0,04230329 |
| d__Bacteria; p__Firmicutes; c__Bacilli; o__Lactobacillales; f__Streptococcaceae                                                                                                      | 0,0428791  |
| d__Bacteria; p__Bacteroidota; c__Bacteroidia; o__Bacteroidales; f__Prevotellaceae; g__Prevotella                                                                                     | 0,04335862 |
| d__Bacteria; p__Bacteroidota; c__Bacteroidia; o__Bacteroidales; f__Porphyromonadaceae; g__Porphyromonas; s__Porphyromonas_sp._oral_clone_DP023                                       | 0,04368534 |
| d__Bacteria; p__Bacteroidota; c__Bacteroidia; o__Bacteroidales; f__Prevotellaceae; g__Alloprevotella; s__Prevotella_sp.                                                              | 0,04375866 |
| d__Bacteria; p__Bacteroidota; c__Bacteroidia; o__Bacteroidales; f__Prevotellaceae; g__Prevotella; s__Prevotella_pallens                                                              | 0,04385897 |
| d__Bacteria; p__Bacteroidota; c__Bacteroidia; o__Bacteroidales; f__Prevotellaceae; g__Prevotella; s__Prevotella_sp._GEJ23                                                            | 0,044475   |
| d__Bacteria; p__Firmicutes; c__Negativicutes; o__Veillonellales-Selenomonadales; f__Veillonellaceae; g__Veillonella                                                                  | 0,04464286 |
| d__Bacteria; p__Firmicutes; c__Clostridia; o__Lachnospirales; f__Lachnospiraceae; g__Lachnoanaerobaculum; s__uncultured_organism                                                     | 0,04466035 |
| d__Bacteria; p__Firmicutes; c__Clostridia; o__Peptostreptococcales-Tissierellales; f__Peptostreptococcales-Tissierellales; g__Parvimonas                                             | 0,04482621 |
| d__Bacteria; p__Bacteroidota; c__Bacteroidia; o__Bacteroidales; f__Porphyromonadaceae; g__Porphyromonas; s__unidentified                                                             | 0,04523411 |
| d__Bacteria; p__Bacteroidota; c__Bacteroidia; o__Bacteroidales; f__Prevotellaceae; g__Alloprevotella; s__Prevotella_sp.                                                              | 0,04531511 |
| d__Bacteria; p__Bacteroidota; c__Bacteroidia; o__Bacteroidales; f__Prevotellaceae; g__Prevotella; s__Prevotella_sp._oral_taxon_299_str._F0039                                        | 0,0457264  |
| d__Bacteria; p__Bacteroidota; c__Bacteroidia; o__Bacteroidales; f__Prevotellaceae; g__Alloprevotella                                                                                 | 0,04575555 |
| d__Bacteria; p__Proteobacteria; c__Gammaproteobacteria; o__Pasteurellales; f__Pasteurellaceae                                                                                        | 0,04585674 |
| d__Bacteria; p__Proteobacteria; c__Gammaproteobacteria; o__Pasteurellales; f__Pasteurellaceae                                                                                        | 0,04603591 |
| d__Bacteria; p__Bacteroidota; c__Bacteroidia; o__Bacteroidales; f__Prevotellaceae; g__Prevotella; s__Prevotella_pallens                                                              | 0,0462963  |
| d__Bacteria; p__Bacteroidota; c__Bacteroidia; o__Bacteroidales; f__Prevotellaceae; g__Prevotella; s__Prevotella_pallens                                                              | 0,04690699 |
| d__Bacteria; p__Firmicutes; c__Negativicutes; o__Veillonellales-Selenomonadales; f__Veillonellaceae; g__Veillonella                                                                  | 0,04749845 |
| d__Bacteria; p__Firmicutes; c__Bacilli; o__Lactobacillales; f__Streptococcaceae                                                                                                      | 0,04808585 |
| d__Bacteria; p__Fusobacteriota; c__Fusobacteriia; o__Fusobacteriales; f__Fusobacteriaceae; g__Fusobacterium                                                                          | 0,04824212 |



|                                                                                                                                                                                      |            |
|--------------------------------------------------------------------------------------------------------------------------------------------------------------------------------------|------------|
| d__Bacteria; p__Bacteroidota; c__Bacteroidia; o__Bacteroidales; f__Prevotellaceae; g__Alloprevotella                                                                                 | 0,04870998 |
| d__Bacteria; p__Bacteroidota; c__Bacteroidia; o__Bacteroidales; f__Prevotellaceae; g__Prevotella; s__Prevotella_intermedia                                                           | 0,04887762 |
| d__Bacteria; p__Fusobacteriota; c__Fusobacteriia; o__Fusobacteriales; f__Fusobacteriaceae; g__Fusobacterium                                                                          | 0,04919849 |
| d__Bacteria; p__Patescibacteria; c__Gracilibacteria; o__Absconditabacteriales_(SR1); f__Absconditabacteriales_(SR1); g__Absconditabacteriales_(SR1); s__SR1_bacterium_oral_taxon_875 | 0,04932912 |
| d__Bacteria; p__Bacteroidota; c__Bacteroidia; o__Bacteroidales; f__Prevotellaceae; g__Alloprevotella; s__Prevotella_sp.                                                              | 0,04995264 |
| d__Bacteria; p__Firmicutes; c__Bacilli; o__Erysipelotrichales; f__Erysipelotrichaceae; g__Solobacterium; s__Solobacterium_moorei                                                     | 0,05012326 |
| d__Bacteria; p__Firmicutes; c__Negativicutes; o__Veillonellales-Selenomonadales; f__Veillonellaceae; g__Veillonella                                                                  | 0,05065513 |
| d__Bacteria; p__Bacteroidota; c__Bacteroidia; o__Bacteroidales; f__Prevotellaceae; g__Prevotella; s__Prevotella_sp_oral_taxon_299_str_F0039                                          | 0,05066123 |
| d__Bacteria; p__Bacteroidota; c__Bacteroidia; o__Bacteroidales; f__Prevotellaceae; g__Prevotella; s__Prevotella_intermedia                                                           | 0,05112946 |
| d__Bacteria; p__Bacteroidota; c__Bacteroidia; o__Bacteroidales; f__Prevotellaceae; g__Prevotella; s__Prevotella_intermedia                                                           | 0,05128314 |
| d__Bacteria; p__Bacteroidota; c__Bacteroidia; o__Bacteroidales; f__Prevotellaceae; g__Prevotella; s__Prevotella_pallens                                                              | 0,05163563 |
| d__Bacteria; p__Fusobacteriota; c__Fusobacteriia; o__Fusobacteriales; f__Leptotrichiaceae; g__Leptotrichia                                                                           | 0,05200886 |
| d__Bacteria; p__Bacteroidota; c__Bacteroidia; o__Bacteroidales; f__Porphyromonadaceae; g__Porphyromonas; s__Porphyromonas_sp_oral_clone_DP023                                        | 0,05279497 |
| d__Bacteria; p__Bacteroidota; c__Bacteroidia; o__Bacteroidales; f__Porphyromonadaceae; g__Porphyromonas; s__Porphyromonas_sp_oral_clone_DP023                                        | 0,05299531 |
| d__Bacteria; p__Bacteroidota; c__Bacteroidia; o__Bacteroidales; f__Prevotellaceae; g__Alloprevotella; s__Prevotella_sp_oral_clone_BU035                                              | 0,05419486 |
| d__Bacteria; p__Bacteroidota; c__Bacteroidia; o__Bacteroidales; f__Prevotellaceae; g__Prevotella; s__Prevotella_sp_oral_taxon_299_str_F0039                                          | 0,05455564 |
| d__Bacteria; p__Firmicutes; c__Bacilli; o__Lactobacillales; f__Streptococcaceae; g__Streptococcus                                                                                    | 0,05545973 |
| d__Bacteria; p__Proteobacteria; c__Gammaproteobacteria; o__Pasteurellales; f__Pasteurellaceae; g__Actinobacillus                                                                     | 0,05619125 |
| d__Bacteria; p__Firmicutes; c__Bacilli; o__Lactobacillales; f__Streptococcaceae; g__Streptococcus                                                                                    | 0,05653501 |
| d__Bacteria; p__Bacteroidota; c__Bacteroidia; o__Bacteroidales; f__Prevotellaceae; g__Prevotella; s__Prevotella_sp_oral_taxon_299_str_F0039                                          | 0,05721818 |
| d__Bacteria; p__Firmicutes; c__Negativicutes; o__Veillonellales-Selenomonadales; f__Veillonellaceae; g__Veillonella                                                                  | 0,05722814 |
| d__Bacteria; p__Firmicutes; c__Clostridia; o__Peptostreptococcales-Tissierellales; f__Peptostreptococcaceae; g__Peptostreptococcus                                                   | 0,0576293  |
| d__Bacteria; p__Firmicutes; c__Clostridia; o__Peptostreptococcales-Tissierellales; f__Peptostreptococcaceae; g__Peptostreptococcus                                                   | 0,05810097 |
| d__Bacteria; p__Bacteroidota; c__Bacteroidia; o__Bacteroidales; f__Prevotellaceae; g__Prevotella; s__Prevotella_sp_oral_taxon_299_str_F0039                                          | 0,05814594 |
| d__Bacteria; p__Actinobacteriota; c__Actinobacteria; o__Micrococcales; f__Micrococcaceae; g__Rothia                                                                                  | 0,0585921  |
| d__Bacteria; p__Bacteroidota; c__Bacteroidia; o__Bacteroidales; f__Prevotellaceae; g__Prevotella; s__Prevotella_sp_oral_taxon_299_str_F0039                                          | 0,05859563 |
| d__Bacteria; p__Bacteroidota; c__Bacteroidia; o__Bacteroidales; f__Prevotellaceae; g__Prevotella; s__Prevotella_sp_GEJ23                                                             | 0,05883254 |
| d__Bacteria; p__Bacteroidota; c__Bacteroidia; o__Bacteroidales; f__Prevotellaceae; g__Prevotella; s__Prevotella_sp_GEJ23                                                             | 0,05966556 |
| d__Bacteria; p__Bacteroidota; c__Bacteroidia; o__Bacteroidales; f__Prevotellaceae; g__Alloprevotella; s__Prevotella_sp.                                                              | 0,06202545 |

|                                                                                                                                                                                      |            |
|--------------------------------------------------------------------------------------------------------------------------------------------------------------------------------------|------------|
| d__Bacteria; p__Bacteroidota; c__Bacteroidia; o__Bacteroidales; f__Prevotellaceae; g__Alloprevotella                                                                                 | 0,06217222 |
| d__Bacteria; p__Firmicutes; c__Bacilli; o__Lactobacillales; f__Streptococcaceae; g__Streptococcus                                                                                    | 0,06401902 |
| d__Bacteria; p__Patescibacteria; c__Gracilibacteria; o__Absconditabacteriales_(SR1); f__Absconditabacteriales_(SR1); g__Absconditabacteriales_(SR1); s__SR1_bacterium_oral_taxon_875 | 0,06412786 |
| d__Bacteria; p__Bacteroidota; c__Bacteroidia; o__Bacteroidales; f__Prevotellaceae; g__Prevotella; s__Prevotella_pallens                                                              | 0,06432602 |
| d__Bacteria; p__Bacteroidota; c__Bacteroidia; o__Bacteroidales; f__Prevotellaceae; g__Prevotella; s__Prevotella_veroralis                                                            | 0,06570057 |
| d__Bacteria; p__Patescibacteria; c__Gracilibacteria; o__Absconditabacteriales_(SR1); f__Absconditabacteriales_(SR1); g__Absconditabacteriales_(SR1); s__SR1_bacterium_oral_taxon_875 | 0,06659432 |
| d__Bacteria; p__Firmicutes; c__Bacilli; o__Lactobacillales; f__Streptococcaceae; g__Streptococcus                                                                                    | 0,06673129 |
| d__Bacteria; p__Bacteroidota; c__Bacteroidia; o__Bacteroidales; f__Prevotellaceae; g__Prevotella; s__Prevotella_sp._oral_taxon_299_str._F0039                                        | 0,06699718 |
| d__Bacteria; p__Firmicutes; c__Bacilli; o__Lactobacillales; f__Streptococcaceae                                                                                                      | 0,06731075 |
| d__Bacteria; p__Firmicutes; c__Negativicutes; o__Veillonellales-Selenomonadales; f__Veillonellaceae; g__Veillonella                                                                  | 0,07066055 |
| d__Bacteria; p__Proteobacteria; c__Gammaproteobacteria; o__Burkholderiales; f__Neisseriaceae; g__Neisseria                                                                           | 0,07078695 |
| d__Bacteria; p__Firmicutes; c__Bacilli; o__Staphylococcales; f__Gemellaceae; g__Gemella                                                                                              | 0,0720826  |
| d__Bacteria; p__Fusobacteriota; c__Fusobacteriia; o__Fusobacteriales; f__Fusobacteriaceae; g__Fusobacterium                                                                          | 0,07535288 |
| d__Bacteria; p__Bacteroidota; c__Bacteroidia; o__Bacteroidales; f__Prevotellaceae; g__Alloprevotella; s__Alloprevotella_tannerae                                                     | 0,07592131 |
| d__Bacteria; p__Proteobacteria; c__Gammaproteobacteria; o__Pasteurellales; f__Pasteurellaceae                                                                                        | 0,07700344 |
| d__Bacteria; p__Bacteroidota; c__Bacteroidia; o__Bacteroidales; f__Prevotellaceae; g__Alloprevotella; s__Prevotella_sp.                                                              | 0,0782809  |
| d__Bacteria; p__Bacteroidota; c__Bacteroidia; o__Bacteroidales; f__Prevotellaceae; g__Prevotella; s__Prevotella_pallens                                                              | 0,07908949 |
| d__Bacteria; p__Firmicutes; c__Negativicutes; o__Veillonellales-Selenomonadales; f__Veillonellaceae; g__Veillonella                                                                  | 0,08031081 |
| d__Bacteria; p__Bacteroidota; c__Bacteroidia; o__Bacteroidales; f__Prevotellaceae; g__Alloprevotella; s__Prevotella_sp.                                                              | 0,08122962 |
| d__Bacteria; p__Bacteroidota; c__Bacteroidia; o__Bacteroidales; f__Porphyromonadaceae; g__Porphyromonas; s__unidentified                                                             | 0,08210847 |
| d__Bacteria; p__Firmicutes; c__Negativicutes; o__Veillonellales-Selenomonadales; f__Veillonellaceae; g__Veillonella                                                                  | 0,08220818 |
| d__Bacteria; p__Firmicutes; c__Negativicutes; o__Veillonellales-Selenomonadales; f__Veillonellaceae; g__Veillonella                                                                  | 0,08246181 |
| d__Bacteria; p__Bacteroidota; c__Bacteroidia; o__Bacteroidales; f__Prevotellaceae; g__Prevotella; s__Prevotella_intermedia                                                           | 0,08459163 |
| d__Bacteria; p__Proteobacteria; c__Gammaproteobacteria; o__Pasteurellales; f__Pasteurellaceae                                                                                        | 0,08540416 |
| d__Bacteria; p__Bacteroidota; c__Bacteroidia; o__Bacteroidales; f__Prevotellaceae; g__Alloprevotella                                                                                 | 0,08670935 |
| d__Bacteria; p__Firmicutes; c__Bacilli; o__Lactobacillales; f__Streptococcaceae; g__Streptococcus                                                                                    | 0,08798677 |
| d__Bacteria; p__Proteobacteria; c__Gammaproteobacteria; o__Burkholderiales; f__Neisseriaceae; g__Neisseria; s__Neisseria_flavescens                                                  | 0,08991058 |
| d__Bacteria; p__Bacteroidota; c__Bacteroidia; o__Bacteroidales; f__Prevotellaceae; g__Prevotella; s__Prevotella_sp._oral_taxon_299_str._F0039                                        | 0,09202429 |
| d__Bacteria; p__Proteobacteria; c__Gammaproteobacteria; o__Burkholderiales; f__Neisseriaceae; g__Neisseria                                                                           | 0,10102208 |

|                                                                                                                                                |                   |
|------------------------------------------------------------------------------------------------------------------------------------------------|-------------------|
| d__Bacteria; p__Proteobacteria; c__Gammaproteobacteria; o__Burkholderiales; f__Neisseriaceae; g__Neisseria                                     | 0,10380038        |
| d__Bacteria; p__Fusobacteriota; c__Fusobacteriia; o__Fusobacteriales; f__Fusobacteriaceae; g__Fusobacterium                                    | 0,1076125         |
| d__Bacteria; p__Firmicutes; c__Negativicutes; o__Veillonellales-Selenomonadales; f__Veillonellaceae; g__Veillonella                            | 0,11269848        |
| d__Bacteria; p__Bacteroidota; c__Bacteroidia; o__Bacteroidales; f__Prevotellaceae; g__Prevotella; s__Prevotella_sp._oral_taxon_299_str._F0039  | 0,11381797        |
| d__Bacteria; p__Proteobacteria; c__Gammaproteobacteria; o__Burkholderiales; f__Neisseriaceae; g__Neisseria                                     | 0,11708333        |
| d__Bacteria; p__Proteobacteria; c__Gammaproteobacteria; o__Pasteurellales; f__Pasteurellaceae; g__Actinobacillus                               | 0,11749081        |
| d__Bacteria; p__Firmicutes; c__Negativicutes; o__Veillonellales-Selenomonadales; f__Veillonellaceae; g__Veillonella                            | 0,12165745        |
| d__Bacteria; p__Bacteroidota; c__Bacteroidia; o__Bacteroidales; f__Prevotellaceae; g__Prevotella; s__Prevotella_veroralis                      | 0,14272838        |
| d__Bacteria; p__Bacteroidota; c__Bacteroidia; o__Bacteroidales; f__Porphyromonadaceae; g__Porphyromonas; s__Porphyromonas_sp._oral_clone_DP023 | 0,15123525        |
| d__Bacteria; p__Firmicutes; c__Negativicutes; o__Veillonellales-Selenomonadales; f__Veillonellaceae; g__Veillonella                            | 0,17451165        |
| <u>d__Bacteria; p__Proteobacteria; c__Gammaproteobacteria; o__Burkholderiales; f__Neisseriaceae; g__Neisseria</u>                              | <u>0,17724353</u> |

| <b>Table S3. Sequencing data from viral and microbial metagenomes (raw sequencing data)</b> |                                         |
|---------------------------------------------------------------------------------------------|-----------------------------------------|
| Sample group                                                                                | Total No. of sequenced nucleotides (Mb) |
| viral metagenomes (Controls)                                                                | 6704                                    |
| viral metagenomes (IgA deficiency)                                                          | 5900                                    |
| cell metagenomes (Controls)                                                                 | 44672                                   |
| cell metagenomes (IgA deficiency)                                                           | 50164                                   |
